# Supplementary material for: Scoring model based on the signature of non-m6A-related neoantigen-coding lncRNAs assists in immune microenvironment analysis and TCR-neoantigen pair selection in gliomas
Source: Springer Nature journal article supplement (doi:10.1186/s12967-022-03713-z), 2022-10-29
Supplement: MOESM3 [file 23654120]

# GBMLGG

TCGA

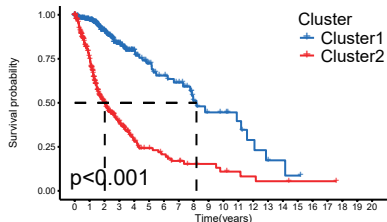

Number at risk

|           |     |     |    |    |    |    |    |    |    |    |    |    |    |    |    |    |    |    |    |    |    |
|-----------|-----|-----|----|----|----|----|----|----|----|----|----|----|----|----|----|----|----|----|----|----|----|
| Cluster 1 | 310 | 246 | 51 | 97 | 59 | 44 | 35 | 29 | 16 | 12 | 11 | 8  | 5  | 3  | 2  | 1  | 0  | 0  | 0  | 0  |    |
| Cluster 2 | 35  | 22  | 10 | 6  | 5  | 3  | 2  | 2  | 1  | 1  | 1  | 0  | 0  | 0  | 0  | 0  | 0  | 0  | 0  | 0  |    |
|           | 0   | 1   | 2  | 3  | 4  | 5  | 6  | 7  | 8  | 9  | 10 | 11 | 12 | 13 | 14 | 15 | 16 | 17 | 18 | 19 | 20 |

# GBM

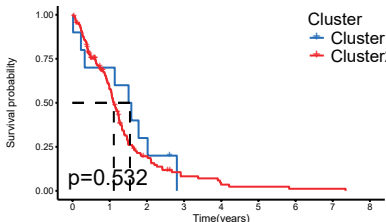

Number at risk

|           |     |    |    |   |   |   |   |   |   |   |   |   |   |   |   |   |   |   |   |   |   |
|-----------|-----|----|----|---|---|---|---|---|---|---|---|---|---|---|---|---|---|---|---|---|---|
| Cluster 1 | 10  | 7  | 3  | 0 | 0 | 0 | 0 | 0 | 0 | 0 | 0 | 0 | 0 | 0 | 0 | 0 | 0 | 0 | 0 | 0 | 0 |
| Cluster 2 | 149 | 71 | 20 | 7 | 3 | 2 | 1 | 1 | 0 | 0 | 0 | 0 | 0 | 0 | 0 | 0 | 0 | 0 | 0 | 0 | 0 |
|           | 0   | 1  | 2  | 3 | 4 | 5 | 6 | 7 | 8 |   |   |   |   |   |   |   |   |   |   |   |   |

# LGG

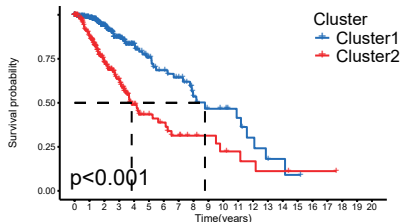

Number at risk

|           |     |     |     |     |    |    |    |    |    |    |    |    |    |    |    |    |    |    |    |    |    |   |
|-----------|-----|-----|-----|-----|----|----|----|----|----|----|----|----|----|----|----|----|----|----|----|----|----|---|
| Cluster 1 | 300 | 239 | 148 | 97  | 59 | 44 | 35 | 29 | 16 | 12 | 11 | 8  | 5  | 3  | 2  | 1  | 0  | 0  | 0  | 0  | 0  |   |
| Cluster 2 | 20  | 8   | 5   | 190 | 68 | 29 | 20 | 16 | 11 | 8  | 7  | 5  | 4  | 3  | 2  | 2  | 1  | 1  | 1  | 0  | 0  | 0 |
|           | 0   | 1   | 2   | 3   | 4  | 5  | 6  | 7  | 8  | 9  | 10 | 11 | 12 | 13 | 14 | 15 | 16 | 17 | 18 | 19 | 20 |   |

CCGA325

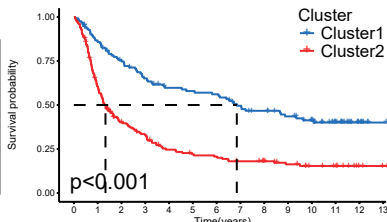

Number at risk

|           |     |     |    |    |    |    |    |    |    |    |    |    |    |    |
|-----------|-----|-----|----|----|----|----|----|----|----|----|----|----|----|----|
| Cluster 1 | 122 | 102 | 86 | 74 | 65 | 63 | 61 | 52 | 47 | 41 | 35 | 21 | 7  | 1  |
| Cluster 2 | 187 | 110 | 67 | 53 | 38 | 33 | 31 | 26 | 23 | 18 | 13 | 11 | 3  | 1  |
|           | 0   | 1   | 2  | 3  | 4  | 5  | 6  | 7  | 8  | 9  | 10 | 11 | 12 | 13 |

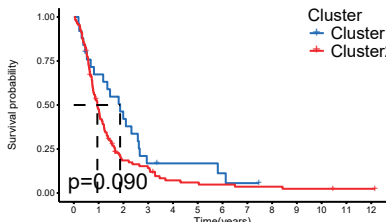

Number at risk

|           |     |    |    |    |   |   |   |   |   |   |    |    |    |   |   |   |   |   |   |   |   |
|-----------|-----|----|----|----|---|---|---|---|---|---|----|----|----|---|---|---|---|---|---|---|---|
| Cluster 1 | 25  | 16 | 10 | 4  | 3 | 3 | 2 | 1 | 0 | 0 | 0  | 0  | 0  | 0 | 0 | 0 | 0 | 0 | 0 | 0 | 0 |
| Cluster 2 | 112 | 51 | 17 | 13 | 6 | 5 | 4 | 3 | 3 | 2 | 2  | 1  | 1  | 1 | 1 | 1 | 1 | 1 | 1 | 1 | 1 |
|           | 0   | 1  | 2  | 3  | 4 | 5 | 6 | 7 | 8 | 9 | 10 | 11 | 12 |   |   |   |   |   |   |   |   |

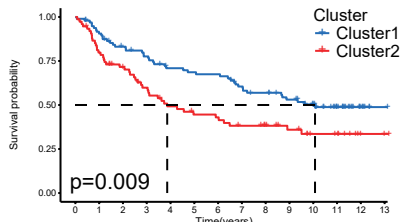

Number at risk

|           |    |    |    |    |    |    |    |    |    |    |    |    |    |    |
|-----------|----|----|----|----|----|----|----|----|----|----|----|----|----|----|
| Cluster 1 | 97 | 86 | 76 | 70 | 62 | 60 | 59 | 51 | 47 | 41 | 35 | 21 | 7  | 1  |
| Cluster 2 | 75 | 59 | 50 | 40 | 32 | 28 | 27 | 23 | 20 | 16 | 11 | 10 | 2  | 1  |
|           | 0  | 1  | 2  | 3  | 4  | 5  | 6  | 7  | 8  | 9  | 10 | 11 | 12 | 13 |

CCGA693

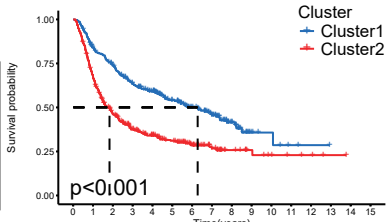

Number at risk

|           |     |     |     |     |     |     |    |    |    |   |    |    |    |    |    |    |   |   |   |   |   |
|-----------|-----|-----|-----|-----|-----|-----|----|----|----|---|----|----|----|----|----|----|---|---|---|---|---|
| Cluster 1 | 291 | 239 | 206 | 167 | 142 | 106 | 77 | 56 | 28 | 7 | 5  | 2  | 1  | 0  | 0  | 0  | 0 | 0 | 0 | 0 | 0 |
| Cluster 2 | 366 | 246 | 158 | 112 | 89  | 69  | 47 | 31 | 15 | 9 | 6  | 4  | 3  | 1  | 0  | 0  | 0 | 0 | 0 | 0 | 0 |
|           | 0   | 1   | 2   | 3   | 4   | 5   | 6  | 7  | 8  | 9 | 10 | 11 | 12 | 13 | 14 | 15 |   |   |   |   |   |

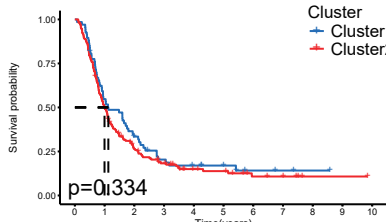

Number at risk

|           |     |    |    |    |    |    |   |   |   |   |    |   |   |   |   |   |   |   |   |   |   |
|-----------|-----|----|----|----|----|----|---|---|---|---|----|---|---|---|---|---|---|---|---|---|---|
| Cluster 1 | 67  | 36 | 21 | 12 | 9  | 7  | 3 | 2 | 1 | 0 | 0  | 0 | 0 | 0 | 0 | 0 | 0 | 0 | 0 | 0 | 0 |
| Cluster 2 | 170 | 84 | 40 | 25 | 14 | 12 | 6 | 5 | 1 | 1 | 0  | 0 | 0 | 0 | 0 | 0 | 0 | 0 | 0 | 0 | 0 |
|           | 0   | 1  | 2  | 3  | 4  | 5  | 6 | 7 | 8 | 9 | 10 |   |   |   |   |   |   |   |   |   |   |

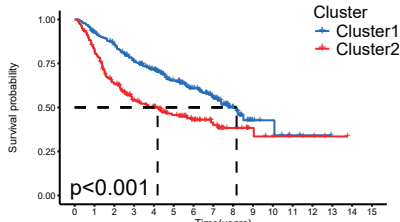

Number at risk

|           |     |     |     |     |     |    |    |    |    |   |    |    |    |    |    |    |   |   |   |   |   |
|-----------|-----|-----|-----|-----|-----|----|----|----|----|---|----|----|----|----|----|----|---|---|---|---|---|
| Cluster 1 | 224 | 203 | 185 | 155 | 133 | 99 | 74 | 54 | 27 | 7 | 5  | 2  | 1  | 0  | 0  | 0  | 0 | 0 | 0 | 0 | 0 |
| Cluster 2 | 196 | 162 | 118 | 87  | 75  | 57 | 41 | 26 | 14 | 8 | 6  | 4  | 3  | 1  | 0  | 0  | 0 | 0 | 0 | 0 | 0 |
|           | 0   | 1   | 2   | 3   | 4   | 5  | 6  | 7  | 8  | 9 | 10 | 11 | 12 | 13 | 14 | 15 |   |   |   |   |   |
