# Supplementary material for: Scoring model based on the signature of non-m6A-related neoantigen-coding lncRNAs assists in immune microenvironment analysis and TCR-neoantigen pair selection in gliomas
Source: Springer Nature journal article supplement (doi:10.1186/s12967-022-03713-z), 2022-10-29

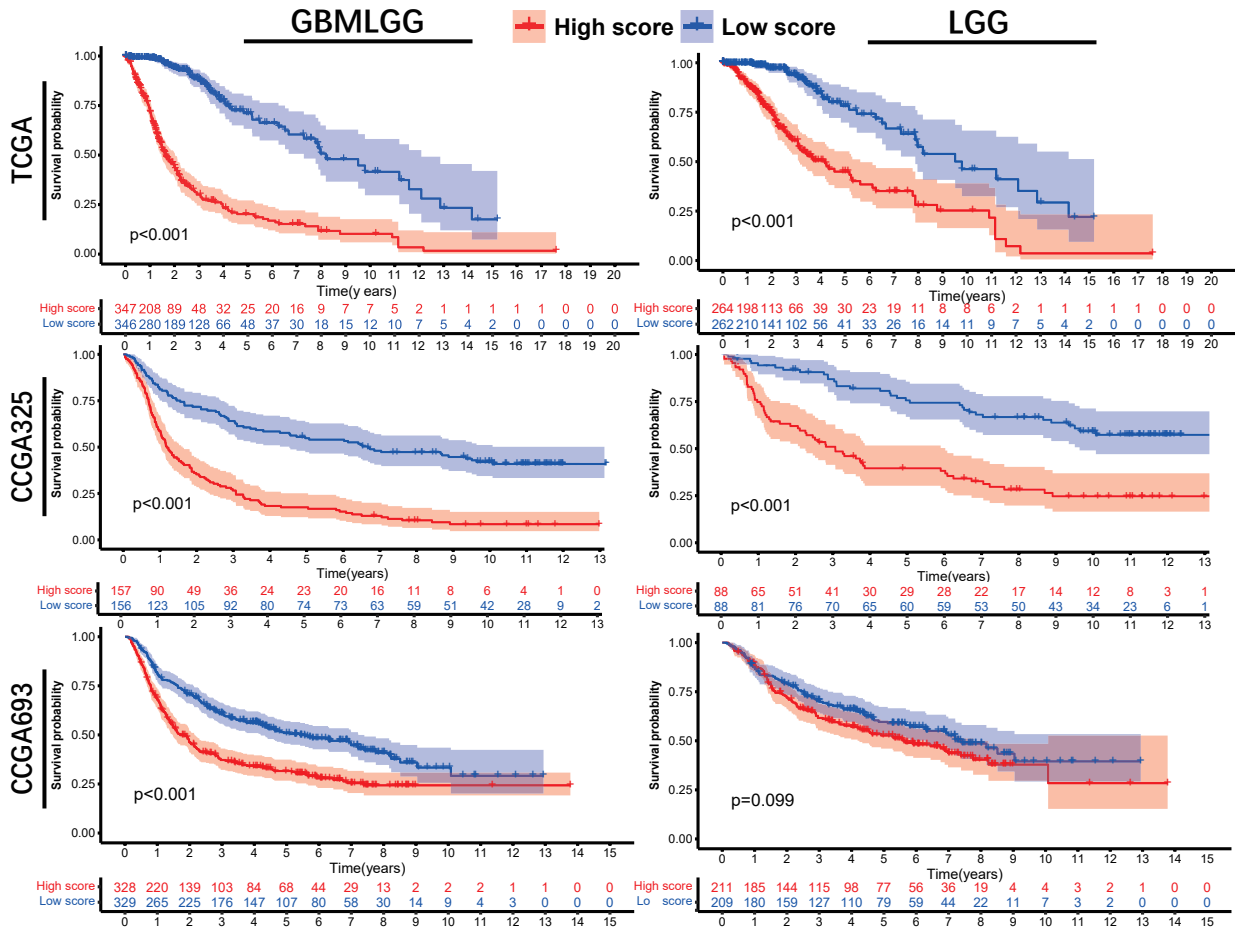

Supplement: MOESM4 [file 23654120]
