# Supplementary material for: Scoring model based on the signature of non-m6A-related neoantigen-coding lncRNAs assists in immune microenvironment analysis and TCR-neoantigen pair selection in gliomas
Source: Springer Nature journal article supplement (doi:10.1186/s12967-022-03713-z), 2022-10-29

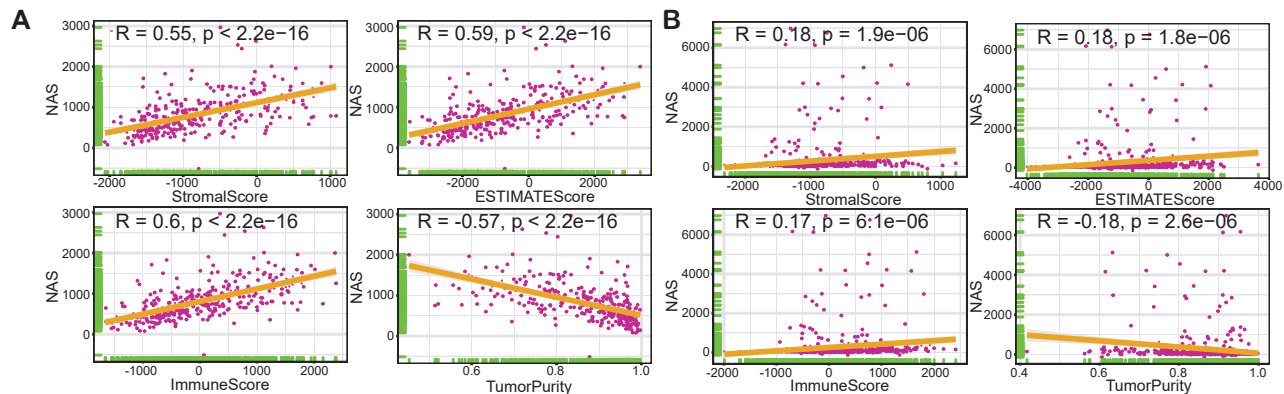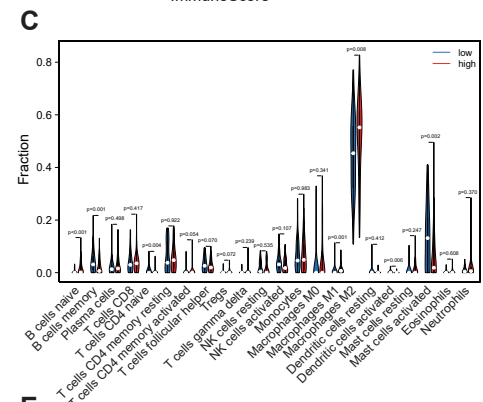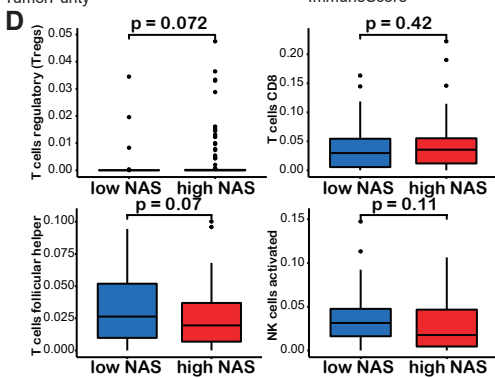

**G**

| Gene          | PC1+PC2     |
|---------------|-------------|
| <b>TMSB10</b> | 603.349147  |
| TMSB4X        | 454.7368611 |
| SPP1          | 382.4859536 |
| CD74          | 257.6634677 |
| HLA-DRA       | 230.243993  |
| CHI3L1        | 215.1306712 |
| <b>VIM</b>    | 202.9118472 |
| AQP1          | 150.8042719 |
| LGALS1        | 103.6522944 |
| HLA-DRB1      | 100.9731173 |

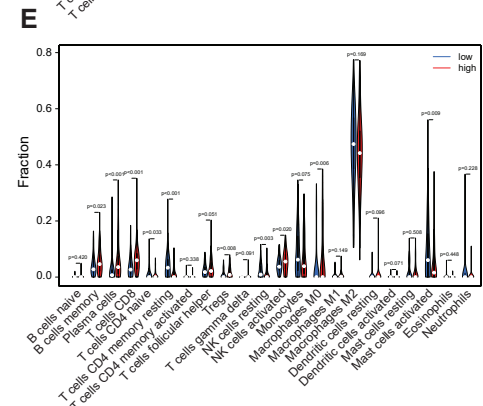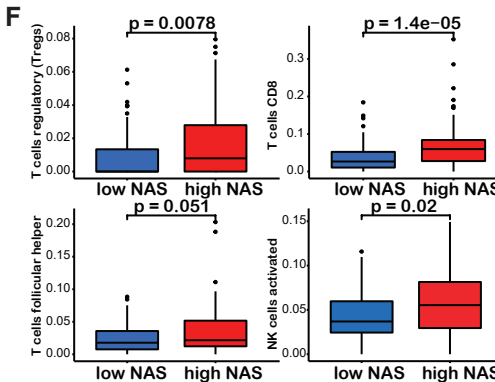

Supplement: MOESM7 [file 23654120]
